# Supplementary material
Source: ML conference proceedings conference paper supplement (https://proceedings.neurips.cc/paper_files/paper/2018/hash/abea47ba24142ed16b7d8fbf2c740e0d-Abstract.html)
Supplement: Supplementary file [file abea47ba24142ed16b7d8fbf2c740e0d-Supplemental.zip]

## A Upper Complexity Bound for Convex SVRG

*Proof of Theorem 1 and Corollary 2.* (2.1) and (2.2) follows directly from the analysis of [21, Thm 3.1] with slight modification.

For the linear rate  $\rho$  in (2.2), we have

$$\begin{aligned}
\rho &\stackrel{(a)}{\leq} 2\left(\frac{1}{\mu\eta m} + 4L_Q\eta + \frac{1}{m}\right) \\
&\stackrel{(b)}{=} 2\left(\frac{1}{\mu\eta m} + 2\kappa_Q^{\frac{1}{2}}m^{-\frac{1}{2}}\right) + \frac{2}{m} \\
&\stackrel{(c)}{=} 2\left(\frac{1}{\mu m} 2L_Q\kappa_Q^{-\frac{1}{2}}m^{\frac{1}{2}} + 2\kappa_Q^{\frac{1}{2}}m^{-\frac{1}{2}}\right) + \frac{2}{m} \\
&= 8\kappa_Q^{\frac{1}{2}}m^{-\frac{1}{2}} + \frac{2}{m} \\
&\stackrel{(d)}{\leq} 8\kappa_Q^{\frac{1}{2}}m^{-\frac{1}{2}} + 2\kappa_Q^{\frac{1}{2}}m^{-\frac{1}{2}} \\
&= 10\kappa_Q^{\frac{1}{2}}m^{-\frac{1}{2}},
\end{aligned}$$

where (a) is by  $\eta = \frac{\kappa_Q^{\frac{1}{2}}m^{-\frac{1}{2}}}{2L_Q} \leq \frac{1}{22L_Q} \leq \frac{1}{8L_Q}$ , (b) is by  $\eta = \frac{\kappa_Q^{\frac{1}{2}}m^{-\frac{1}{2}}}{2L_Q}$ , (c) is by  $\frac{1}{\eta} = 2L_Qm^{\frac{1}{2}}\kappa_Q^{-\frac{1}{2}}$ , and (d) follows from  $\kappa_Q^{\frac{1}{2}}m^{\frac{1}{2}} \geq 1$ .

Therefore, the epoch complexity (i.e. the number of epochs required to reduce the suboptimality to below  $\epsilon$ ) is

$$\begin{aligned}
K_0 &= \lceil \frac{1}{\ln(\frac{1}{10}m^{\frac{1}{2}}\kappa_Q^{-\frac{1}{2}})} \ln \frac{F(x^0) - F(x^*)}{\epsilon} \rceil \\
&\leq \frac{1}{\ln(\frac{1}{10}m^{\frac{1}{2}}\kappa_Q^{-\frac{1}{2}})} \ln \frac{F(x^0) - F(x^*)}{\epsilon} + 1 \\
&= \frac{2}{\ln(1.21 + \frac{1}{100}\frac{n}{\kappa_Q})} \ln \frac{F(x^0) - F(x^*)}{\epsilon} + 1 \\
&= \mathcal{O}\left(\frac{1}{\ln(1.21 + \frac{n}{100\kappa_Q})} \ln \frac{1}{\epsilon}\right) + 1
\end{aligned}$$

where  $\lceil \cdot \rceil$  is the ceiling function, and the second equality is due to  $m = n + 121\kappa_Q$ .

Hence, the gradient complexity is

$$\begin{aligned}
K &= (n + m)K_0 \\
&\leq \mathcal{O}\left(\frac{n + \kappa_Q}{\ln(1.21 + \frac{n}{100\kappa_Q})} \ln \frac{1}{\epsilon}\right) + n + 121\kappa_Q,
\end{aligned}$$

which is equivalent to (2.3).  $\square$

## B Lower Complexity Bound for Convex SVRG

**Definition 2.** [17, Def. 2] An optimization algorithm is called a Canonical Linear Iterative (CLI) optimization algorithm, if given a function  $F$  and initialization points  $\{w_i^0\}_{i \in J}$ , where  $J$  is some index set, it operates by iteratively generating points such that for any  $i \in J$ ,

$$w_i^{k+1} = \sum_{j \in J} O_F(w_j^k; \theta_{ij}^k), \quad k = 0, 1, \dots$$

holds, where  $\theta_{ij}^k$  are parameters chosen, stochastically or deterministically, by the algorithm, possibly depending on the side-information.  $O_F$  is an oracle parameterized by  $\theta_{ij}^k$ . If the

parameters do not depend on previously acquired oracle answers, we say that the given algorithm is oblivious. Lastly, algorithms with  $|J| \leq p$ , for some  $p \in \mathbb{N}$ , are denoted by p-CLI.

In [17], two types of oblivious oracles are considered. The generalized first order oracle for  $F(x) = \frac{1}{n} \sum_{i=1}^n f_i(x)$

$$O(w; A, B, C, j) = A \nabla f_j(w) + Bw + C, \quad A, B \in \mathbb{R}^{d \times d}, C \in \mathbb{R}^d, j \in [n].$$

The steepest coordinate descent oracle for  $F(x) = \frac{1}{n} \sum_{i=1}^n f_i(x)$  is given by

$$O(w; i, j) = w + t^* e_i, \quad t^* \in \arg \min_{t \in \mathbb{R}} f_j(w_1, \dots, w_{i-1}, w + t, w_{i+1}, \dots, w_d), j \in [n],$$

where  $e_i$  is the  $i$ th unit vector. SDCA, SAG, SAGA, SVRG, SARAH, etc. without proximal terms are all  $p$ -CLI oblivious algorithms.

We now state the full version of Theorem 2.

**Theorem 4. Lower complexity bound oblivious p-CLI algorithms.** For any oblivious p-CLI algorithm  $A$ , for all  $\mu, L, k$ , there exist  $L$ -smooth, and  $\mu$ -strongly convex functions  $f_i$  such that at least<sup>14</sup>:

$$K(\epsilon) = \tilde{\Omega} \left( \left( \frac{n}{1 + (\ln(\frac{n}{\kappa}))_+} + \sqrt{n\kappa} \right) \ln \frac{1}{\epsilon} + n \right) \quad (\text{B.1})$$

iterations are needed for  $A$  to obtain expected suboptimality  $\mathbb{E}[f(K(\epsilon)) - f(X^*)] < \epsilon$ .

*Proof of Theorem 4.* In this proof, we use lower bound given in [17, Thm 2], and refine its proof for the case  $n \geq \frac{1}{3}\kappa$ .

[17, Thm 2] gives the following lower bound,

$$K(\epsilon) \geq \Omega(n + \sqrt{n(\kappa - 1)} \ln \frac{1}{\epsilon}). \quad (\text{B.2})$$

Some smaller low-accuracy terms are absorbed are ignored, as is done in [17]. For the case  $n \geq \frac{1}{3}\kappa$ , the proof of [17, Thm 2] tells us that, for any  $k \geq 1$ , there exist  $L$ -Lipschitz differentiable and  $\mu$ -strongly convex quadratic functions  $f_1^k, f_2^k, \dots, f_n^k$  and  $F^k = \frac{1}{n} \sum_{i=1}^n f_i^k$ , such that for any  $x^0$ , the  $x^K$  produced after  $K$  gradient evaluations, we have<sup>15</sup>

$$\mathbb{E}[F^K(x^K) - F^K(x^*)] \geq \frac{\mu}{4} \left( \frac{nR\mu}{L - \mu} \right)^2 \left( \frac{\sqrt{1 + \frac{\kappa-1}{n}} - 1}{\sqrt{1 + \frac{\kappa-1}{n}} + 1} \right)^{\frac{2K}{n}},$$

where  $R$  is a constant and  $\kappa = \frac{L}{\mu}$ .

Therefore, in order for  $\epsilon \geq \mathbb{E}[F(x^k) - F(x^*)]$ , we must have

$$\epsilon \geq \frac{\mu}{4} \left( \frac{nR\mu}{L - \mu} \right)^2 \left( \frac{\sqrt{1 + \frac{\kappa-1}{n}} - 1}{\sqrt{1 + \frac{\kappa-1}{n}} + 1} \right)^{\frac{2K}{n}} = \frac{\mu}{4} \left( \frac{nR\mu}{L - \mu} \right)^2 \left( 1 - \frac{2}{1 + \sqrt{1 + \frac{\kappa-1}{n}}} \right)^{\frac{2K}{n}}.$$

Since  $1 + \frac{1}{3}x \leq \sqrt{1+x}$  when  $0 \leq x \leq 3$ , and  $0 \leq \frac{\kappa-1}{n} \leq \frac{\kappa}{n} \leq 3$ , we have

$$\epsilon \geq \frac{\mu}{4} \left( \frac{nR\mu}{L - \mu} \right)^2 \left( 1 - \frac{2}{2 + \frac{1}{3} \frac{\kappa-1}{n}} \right)^{\frac{2K}{n}},$$

<sup>14</sup>We absorb some smaller low-accuracy terms (high  $\epsilon$ ) as is common practice. Exact lower bound expressions appear in the proof.

<sup>15</sup>note that for the SVRG in Algorithm 1 with  $\psi = 0$ , each update in line 7 is regarded as an iteration.

or equivalently,

$$K \geq \frac{n}{2 \ln(1 + \frac{6n}{\kappa-1})} \ln \left( \frac{\frac{\mu}{4} (\frac{nR}{\kappa-1})^2}{\epsilon} \right).$$

As a result,

$$\begin{aligned} K &\geq \frac{n}{2 \ln(1 + \frac{6n}{\kappa-1})} \ln \frac{1}{\epsilon} + \frac{n}{2 \ln(1 + \frac{6n}{\kappa-1})} \ln \left( \frac{\mu}{4} (\frac{nR}{\kappa-1})^2 \right) \\ &= \frac{n}{2 \ln(1 + \frac{6n}{\kappa-1})} \ln \frac{1}{\epsilon} + \frac{n}{2 \ln(1 + \frac{6n}{\kappa-1})} \ln \left( \frac{\mu R^2}{24} \right) + \frac{n}{\ln(1 + \frac{6n}{\kappa-1})} \ln \frac{6n}{\kappa-1}. \end{aligned}$$

Since  $\frac{\ln \frac{6n}{\kappa-1}}{\ln(1 + \frac{6n}{\kappa-1})} \geq \frac{\ln 2}{\ln 3}$  when  $\frac{n}{\kappa-1} \geq \frac{n}{\kappa} \geq \frac{1}{3}$ , for small  $\epsilon$  we have

$$\begin{aligned} K &\geq \frac{n}{2 \ln(1 + \frac{6n}{\kappa-1})} \ln \frac{1}{\epsilon} + \frac{n}{2 \ln(1 + \frac{6n}{\kappa-1})} \ln \left( \frac{\mu R^2}{24} \right) + \frac{\ln 2}{\ln 3} n \\ &= \Omega \left( \frac{n}{\ln(1 + \frac{6n}{\kappa-1})} \ln \frac{1}{\epsilon} \right) + \frac{\ln 2}{\ln 3} n \end{aligned} \tag{B.3}$$

$$= \Omega \left( \frac{n}{1 + (\ln(n/\kappa))_+} \ln(1/\epsilon) + n \right) \tag{B.4}$$

Now the expression in (B.4) is valid for  $n \geq \frac{1}{3}\kappa$ . When  $n < \frac{1}{3}\kappa$ , the lower bound in (B.4) is asymptotically equal to  $\Omega(n \ln(1/\epsilon) + n)$ , which is dominated by (B.2). Hence the lower bound in (B.4) is valid for all  $\kappa, n$ .

We may sum the lower bounds in (B.2) and (B.4) to obtain (B.1). This is because given an oblivious p-CLI algorithm, we may simply chose the adversarial example that has the corresponding greater lower bound.  $\square$

## C Lower Complexity Bound for SDCA

*Proof of Proposition 1.* Let  $\phi_i(t) = \frac{1}{2}t^2$ ,  $\lambda = \mu$ , and  $y_i$  be the  $i$ th column of  $Y$ , where  $Y = c(n^2I + J)$  and  $J$  is the matrix with all elements being 1, and  $c = (n^4 + 2n^2 + n)^{-1/2}(L - \mu)^{1/2}$ . Then

$$\begin{aligned} f_i(x) &= \frac{1}{2}(x^T y_i)^2 + \frac{1}{2}\mu \|x\|^2, \\ F(x) &= \frac{1}{2n} \|Y^T x\|^2 + \frac{1}{2}\mu \|x\|^2, \\ D(\alpha) &= \frac{1}{n\mu} \left( \frac{1}{2n} \|Y\alpha\|^2 + \frac{1}{2}\mu \|\alpha\|^2 \right). \end{aligned}$$

Since

$$\|y_i\|^2 = c^2((n^2 + 1)^2 + n - 1) = c^2(n^4 + 2n^2 + n) = L - \mu,$$

$f_i$  is  $L$ -smooth and  $\mu$ -strongly convex, and that  $x^* = \mathbf{0}$ .

We also have

$$\nabla D(\alpha) = \frac{1}{n\mu} \left( \frac{1}{n} Y^2 \alpha + \mu \alpha \right) = \frac{1}{n\mu} ((c^2 n^3 I + 2nc^2 J + c^2 J) \alpha + \mu \alpha),$$

So for every  $k \geq 0$ , minimizing with respect to  $\alpha_{i_k}$  as in (2.5) yields the optimality condition:

$$\begin{aligned} 0 &= e_{i_k}^T \nabla D(\alpha^{k+1}) \\ &= \frac{1}{n\mu} (c^2 n^3 \alpha_{i_k}^{k+1} + 2c^2 n (\sum_{j \neq i_k} \alpha_j^k + \alpha_{i_k}^{k+1}) + c^2 (\sum_{j \neq i_k} \alpha_j^k + \alpha_{i_k}^{k+1}) + \mu \alpha_{i_k}^{k+1}). \end{aligned}$$

Therefore, rearranging yields:

$$\alpha_{i_k}^{k+1} = -\frac{(c^2 + 2c^2 n)}{c^2 n^3 + 2c^2 n + c^2 + \mu} \sum_{j \neq i_k} \alpha_j^k = -\frac{(c^2 + 2c^2 n)}{c^2 n^3 + 2c^2 n + c^2 + \mu} (e_{i_k}^T (J - I) \alpha^k).$$

As a result,

$$\alpha^{k+1} = (I - e_{i_k} e_{i_k}^T) \alpha^k - \frac{(c^2 + 2c^2 n)}{c^2 n^3 + 2c^2 n + c^2 + \mu} (e_{i_k} e_{i_k}^T (J - I) \alpha^k).$$

Taking full expectation on both sides gives

$$\mathbb{E} \alpha^{k+1} = \left( (1 - \frac{1}{n}) I - \frac{(c^2 + 2c^2 n)}{c^2 n^3 + 2c^2 n + c^2 + \mu} \frac{J - I}{n} \right) \mathbb{E} \alpha^k \triangleq T \mathbb{E} \alpha^k.$$

for linear operator  $T$ . Hence we have by Jensen's inequality:

$$\begin{aligned} \mathbb{E} \|x^k\|^2 &= n^{-2} \mu^{-2} \mathbb{E} \|Y \alpha^k\|^2 \\ &\geq n^{-2} \mu^{-2} \|Y \mathbb{E} \alpha^k\|^2 \\ &= n^{-2} \mu^{-2} \|Y T^k \alpha^0\|^2 \end{aligned}$$

We let  $\alpha^0 = (1, \dots, 1)$ , which is an vector of  $T$ . Let us say the corresponding eigenvalue for  $T$  is  $\theta$ :

$$\mathbb{E} \|x^k\|^2 \geq \theta^{2k} n^{-2} \mu^{-2} \|Y \alpha^0\|^2 \quad (\text{C.1})$$

$$= \theta^{2k} \|x^0\|^2 \quad (\text{C.2})$$

We now analyze the value of  $\theta$ :

$$\begin{aligned} \theta &= (1 - \frac{1}{n}) - \frac{(c^2 + 2c^2 n)}{c^2 n^3 + 2c^2 n + c^2 + \mu} \frac{n - 1}{n} \\ &= 1 - \frac{1}{n} - \frac{1 + 2n}{n^3 + 2n + 1 + \mu c^{-2}} \frac{n - 1}{n} \\ &\geq 1 - \frac{1}{n} - \frac{1 + 2n}{n^3 + 2n + 1} \\ &\geq 1 - \frac{2}{n} \end{aligned}$$

for  $n > 2$ . This in combination with (C.2) yields (2.7).  $\square$

## D Nonconvex SVRG Analysis

*Proof of Theorem 3.* Without loss of generality, we can assume  $x^* = \mathbf{0}$  and  $F(x^*) = 0$ .

According to lemma 3.3 and Lemma 5.1 of [20], for any  $u \in \mathbb{R}^d$ , and  $\eta \leq \frac{1}{2} \min \left\{ \frac{1}{L}, \frac{1}{\sqrt{m}L} \right\}$  we have

$$\mathbb{E}[F(x^{j+1}) - F(u)] \leq \mathbb{E} \left[ -\frac{1}{4m\eta} \|x^{j+1} - x^j\|^2 + \frac{\langle x^j - x^{j+1}, x^j - u \rangle}{m\eta} - \frac{\mu}{4} \|x^{j+1} - u\|^2 \right],$$

or equivalently,

$$\mathbb{E}[F(x^{j+1}) - F(u)] \leq \mathbb{E} \left[ \frac{1}{4m\eta} \|x^{j+1} - x^j\|^2 + \frac{1}{2m\eta} \|x^j - u\|^2 - \frac{1}{2m\eta} \|x^{j+1} - u\|^2 - \frac{\mu}{4} \|x^{j+1} - u\|^2 \right].$$

Setting  $u = x^* = 0$  and  $u = x^j$  yields the following two inequalities:

$$F(x^{j+1}) \leq \frac{1}{4m\eta} (\|x^{j+1} - x^j\|^2 + 2\|x^j\|^2 - 2(1 + \frac{1}{2}m\eta\mu)\|x^{j+1}\|^2), \quad (\text{D.1})$$

$$F(x^{j+1}) - F(x^j) \leq -\frac{1}{4m\eta} (1 + m\eta\mu) \|x^{j+1} - x^j\|^2. \quad (\text{D.2})$$

Define  $\tau = \frac{1}{2}m\eta\mu$ , multiply  $(1 + 2\tau)$  to (D.1), then add it to (D.2) yields

$$2(1 + \tau)F(x^{j+1}) - F(x^j) \leq \frac{1}{2m\eta} (1 + 2\tau) (\|x^j\|^2 - (1 + \tau)\|x^{j+1}\|^2).$$

Multiplying both sides by  $(1 + \tau)^j$  gives

$$2(1 + \tau)^{j+1}F(x^{j+1}) - (1 + \tau)^jF(x^j) \leq \frac{1}{2m\eta}(1 + 2\tau)((1 + \tau)^j\|x^j\|^2 - (1 + \tau)^{j+1}\|x^{j+1}\|^2).$$

Summing over  $j = 0, 1, \dots, k-1$ , we have

$$(1 + \tau)^kF(x^k) + \sum_{j=0}^{k-1}(1 + \tau)^jF(x^j) - F(x^0) \leq \frac{1}{2m\eta}(1 + 2\tau)(\|x^0\|^2 - (1 + \tau)^k\|x^k\|^2).$$

Since  $F(x^j) \geq 0$ , we have

$$F(x^k)(1 + \tau)^k \leq F(x^0) + \frac{1}{2m\eta}(1 + 2\tau)\|x^0\|^2.$$

By the strong convex of  $F$ , we have  $F(x^0) \geq \frac{\mu}{2}\|x^0\|^2$ , therefore

$$F(x^k)(1 + \tau)^k \leq F(x^0)(2 + \frac{1}{2\tau}),$$

Finally,  $\eta = \frac{1}{2} \min\{\frac{1}{L}, (\frac{1}{L^2 m})^{\frac{1}{2}}\}$  gives

$$\frac{1}{\tau} = 4 \max\{\frac{\kappa}{m}, (\frac{\bar{L}^2}{m\mu^2})^{\frac{1}{2}}\} \leq 4(\frac{\kappa}{m} + (\frac{\bar{L}^2}{m\mu^2})^{-\frac{1}{2}}),$$

which yields

$$F(x^k) \leq (1 + \tau)^{-k}F(x^0)(2 + 2(\frac{\kappa}{m} + (\frac{\bar{L}^2}{m\mu^2})^{-\frac{1}{2}})).$$

To prove (4.2), we notice that

$$\tau = \frac{1}{4} \min\{\frac{m}{\kappa}, (\frac{m\mu^2}{\bar{L}^2})^{\frac{1}{2}}\},$$

so we have

$$\frac{1}{\ln(1 + \tau)} \leq \frac{1}{\ln(1 + \frac{m}{4\kappa})} + \frac{1}{\ln(1 + (\frac{m\mu^2}{4\bar{L}^2})^{\frac{1}{2}})}$$

Now for small  $\epsilon$ , the epoch complexity can be written as

$$\begin{aligned} K_0 &= \lceil \frac{1}{\ln(1 + \tau)} \ln \frac{F(x^0)(2 + 2(\frac{\kappa}{m} + (\frac{\bar{L}^2}{m\mu^2})^{-\frac{1}{2}}))}{\epsilon} \rceil \\ &\leq \mathcal{O}\left(\left(\frac{1}{\ln(1 + \frac{m}{4\kappa})} + \frac{1}{\ln(1 + (\frac{m\mu^2}{4\bar{L}^2})^{\frac{1}{2}})}\right) \ln \frac{1}{\epsilon}\right) + 1. \end{aligned}$$

Since  $m = \min\{2, n\}$ , we have a gradient complexity of

$$K = (n + m)K_0 \leq \mathcal{O}\left(\left(\frac{n}{\ln(1 + \frac{n}{4\kappa})} + \frac{n}{\ln(1 + (\frac{n\mu^2}{4\bar{L}^2})^{\frac{1}{2}})}\right) \ln \frac{1}{\epsilon}\right) + 2n.$$

And this is equivalent to the expression in (4.3).

□
